# Supplementary material for: Off-stoichiometry in I–III–VI2 chalcopyrite absorbers: a comparative analysis of structures and stabilities
Source: Royal Society of Chemistry journal article supplement (doi:10.1039/d2fd00105e), 2022-01-01
Supplement: d2fd00105e1.pdf [file d2fd00105e1.pdf]

Supplementary information for:

## Off-stoichiometry in I-III-VI<sub>2</sub> chalcopyrite absorbers: a comparative analysis of structures and stabilities

Kostiantyn V. Sopiha<sup>1,\*</sup>, Jes K. Larsen<sup>1</sup>, Jan Keller<sup>1</sup>, Marika Edoff<sup>1</sup>, Charlotte Platzer-Björkman<sup>1</sup>, and Jonathan J. S. Scragg<sup>1</sup>

<sup>1</sup> – Division of Solar Cell Technology, Department of Materials Science and Engineering, Uppsala University, Sweden

\* Corresponding author: K. V. Sopiha ([kostiantyn.sopiha@gmail.com](mailto:kostiantyn.sopiha@gmail.com))

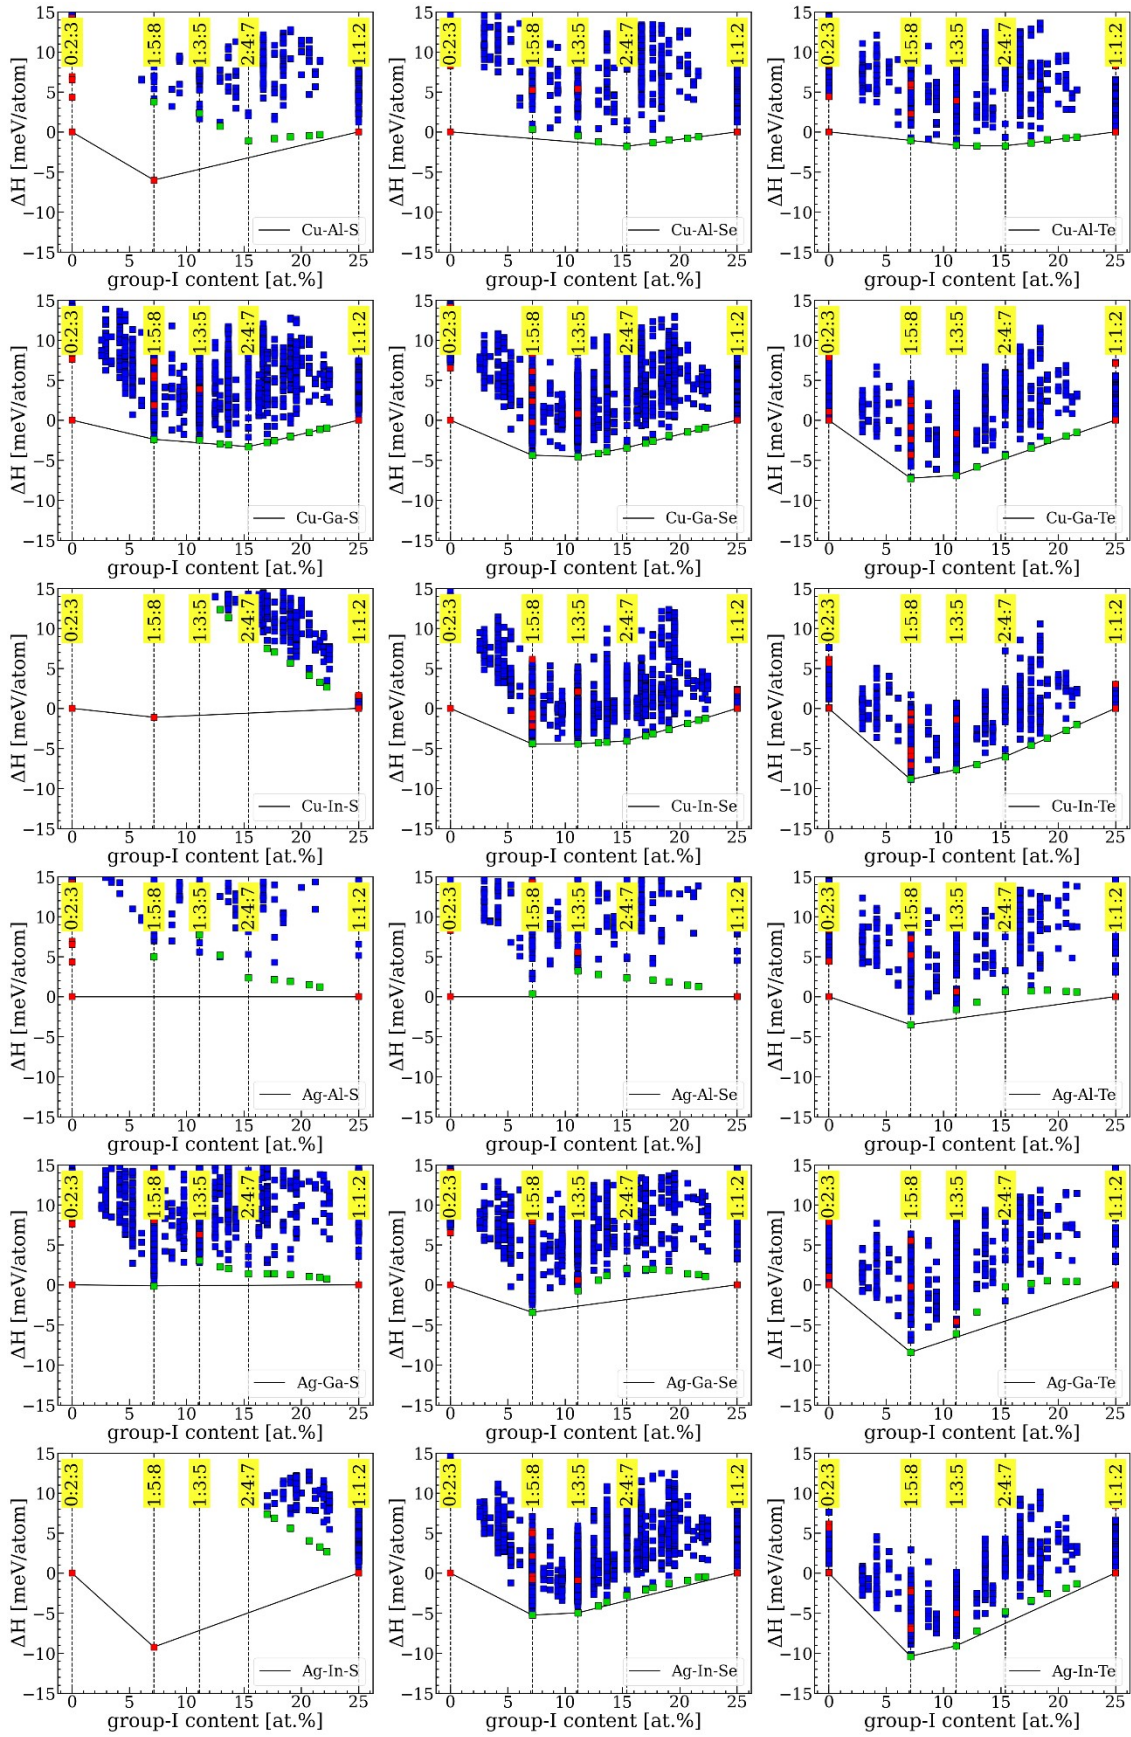

Figure S1. Convex hulls constructed for different I-III-VI systems. The ordinate axis ( $\Delta H$ ) is the formation enthalpy relative to a mixture of terminal phases (i.e. 1:1:2 and 0:2:3).

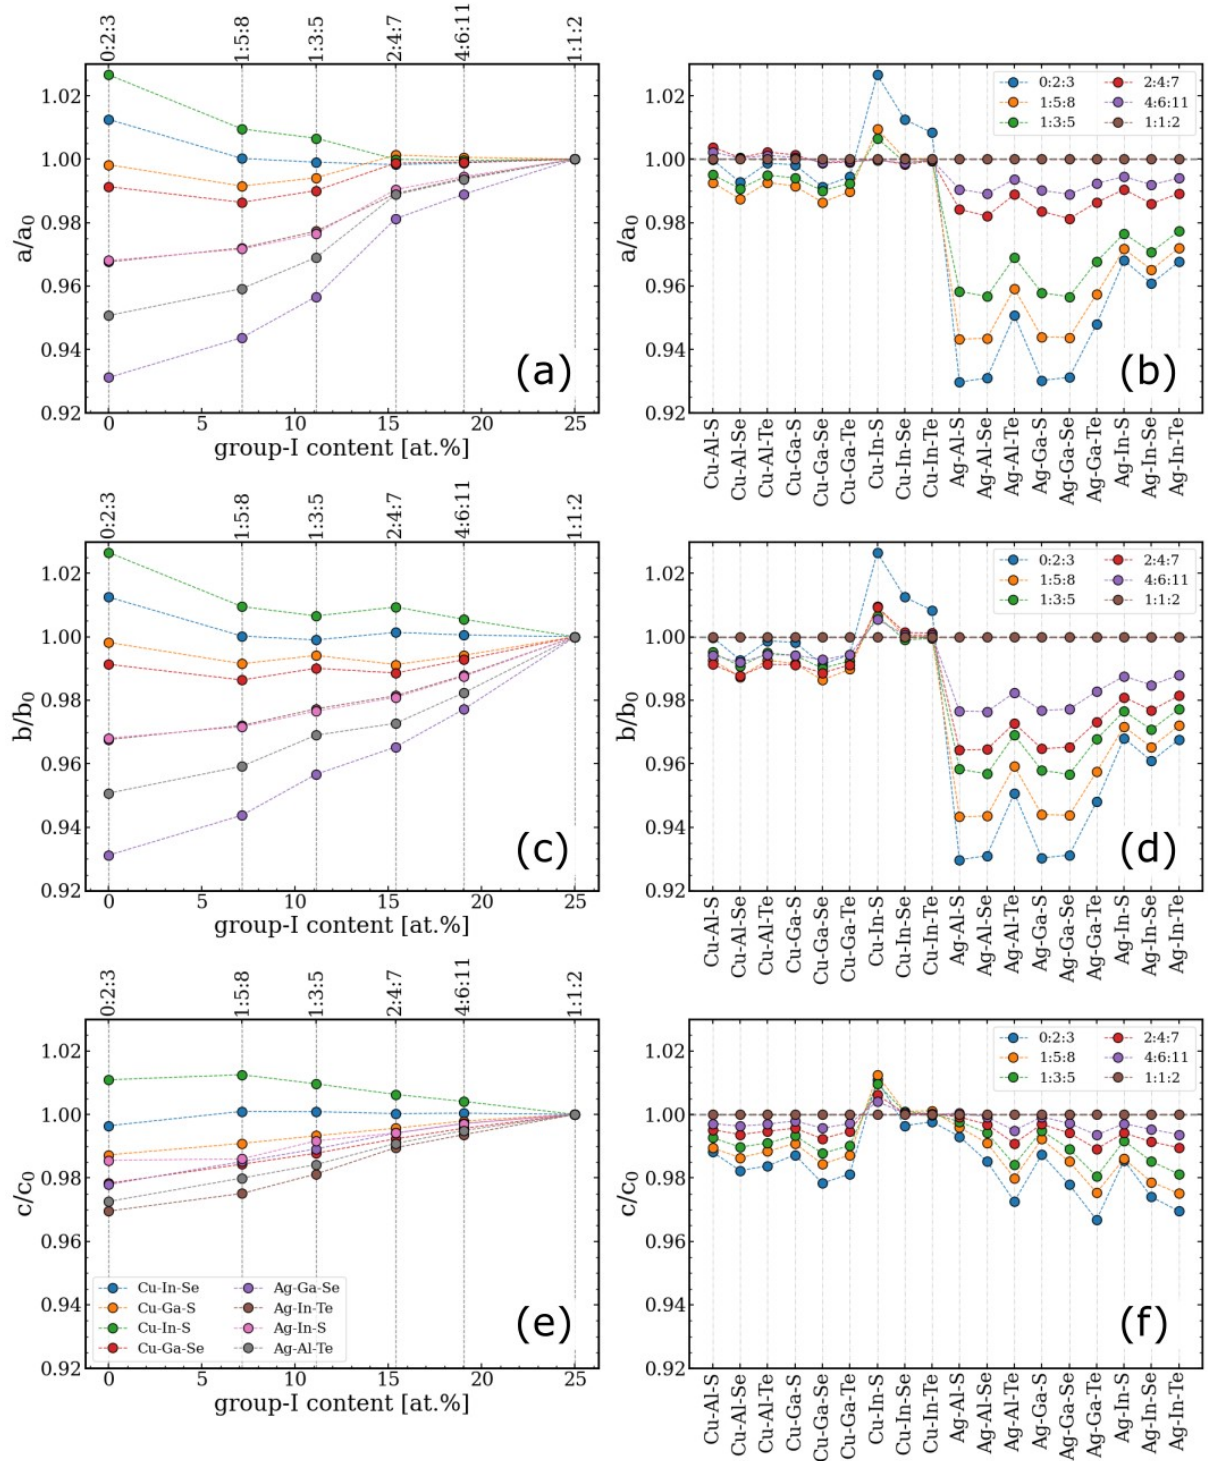

Figure S2. Ratios of the lattice parameters for ODCs related to the respective values for the corresponding chalcopyrite phase. The ratios are plotted versus (a,c,e) group-I content (for eight arbitrary systems) and (b,d,f) type of system for the entire I-III-VI family considered.

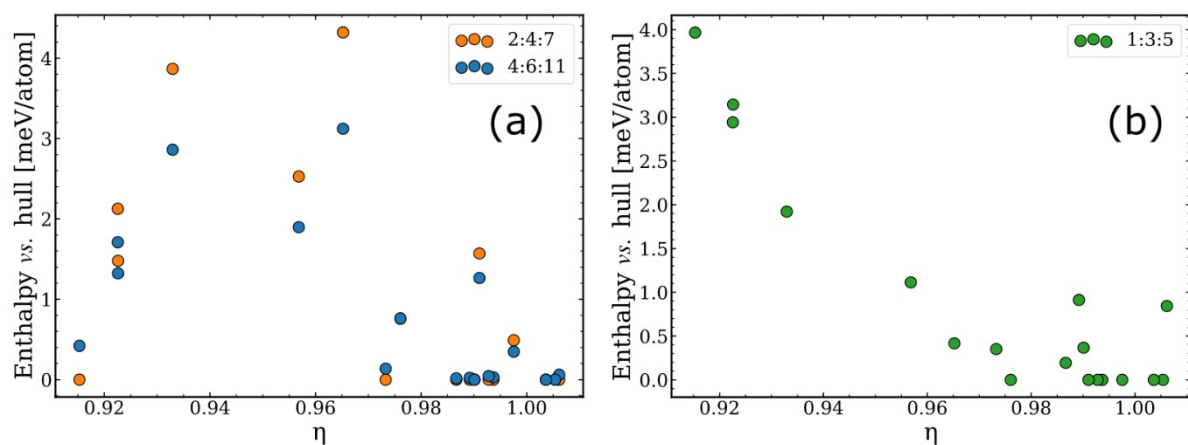

Figure S3. Enthalpies of (a) 2:4:7/4:6:11 ODCs and (b) 1:3:5 ODC related to convex hull versus tetragonal distortion in different I-III-VI systems.

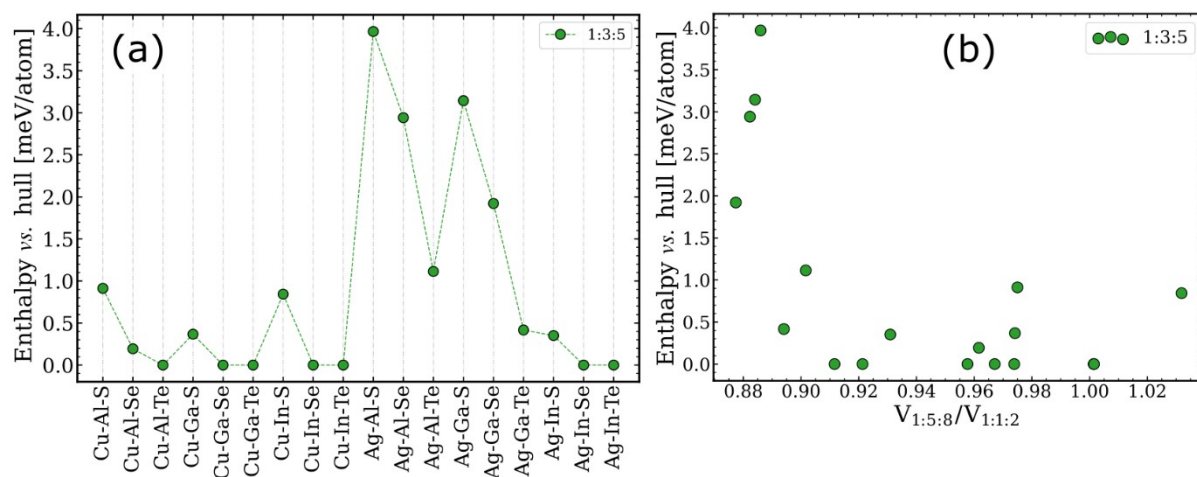

Figure S4. Enthalpies of 1:3:5 ODC above the simplified convex hull (consisting of five representative ZB-derived structures). The Enthalpies are presented (a) for different I-III-VI systems and (b) versus the ratio of the per-anion volume of 1:5:8 ODC to that of the 1:1:2 phase.
